# Supplementary material for: Forensic analysis of float glass using laser ablation inductively coupled plasma mass spectrometry (LA-ICP-MS): validation of a method
Source: Royal Society of Chemistry journal article supplement (doi:10.1039/b606109e), 2006-01-01
Supplement: b606109e.doc [file b606109e.doc]

**This journal is © The Royal Society of Chemistry 2006**

10

cm

50 cm

40 cm

**H1**

**H2**

**H3**

**H4**

**H5**

10

cm

50 cm

23 cm

**H6**

**H7**

**H8**

**H9**

**H10**

a)

b)

**Fig. S1** Sampling scheme for the large single glass pane a) along the pane and b) across the pane. Dots indicate the sampling location (samples H1 through H10 as explained in section 2.1.1).

Z

W

T

Y

V

X

S

U

R

9

6

3

8

5

7

2

4

1

a)

b)

75cm

**Fig. S2** Sampling scheme for double window A from a single supplier a) inner pane (letters) and b) outer pane (numbers). Dots indicate the sampling location as explained in section 2.1.2 (samples R through Z and 1 through 9).

2A

2B

1

5

3

4C

4B

4A

1.58 m

0.63 m

**Fig. S3** Sampling scheme for the store window as described in section 2.1.3.

**Table S1** Measuring scheme for the 4 sequences in each of the 5 experiments as explained in section 2.1.1.

| **experiments** | **sequence** | **samples** |
| --- | --- | --- |
| 1, 2, 3 | 1 | H1, H2, H3 |
|  | 2 | H4, H5, H6, |
|  | 3 | H7, H8, H9 |
|  | 4 | H10 |
|  |  |  |
| 4, 5 | 1 | H4, H9, H2 |
|  | 2 | H1, H6, H10 |
|  | 3 | H3, H5, H8 |
|  | 4 | H7 |

**Table S2** Measuring scheme with the sequences followed for the analysis of the store window as described in section 2.1.3.

| **Sequence** | **Samples** |
| --- | --- |
| 1 | 1.1, 1.2, 1.3 |
| 2 | 2A1, 2A2, 2A3 |
| 3 | 3.1, 3.2, 3.3 |
| 4 | 2B1, 2B2, 2B3 |
| 5 | 4A, 4B1, 4B2 |
| 6 | 4C1, 4C2, 5 |

##### Table S3 Placket-Burman design for the ruggedness test described in section 3.2 (the ‘-’ sign represent the lower value and the ‘+’ the higher value).

| **exp** | **frequency, Hz** | **energy output, %** | **diameter, m** | **nebulizer flow, Lmin-1** | **a** | **b** | **c** |
| --- | --- | --- | --- | --- | --- | --- | --- |
| **1** | 12 | 100 | 70 | 0.96 | + | - | - |
| **2** | 8 | 100 | 70 | 1.00 | - | + | - |
| **3** | 8 | 90 | 70 | 1.00 | + | - | + |
| **4** | 12 | 90 | 50 | 1.00 | + | + | - |
| **5** | 8 | 100 | 50 | 0.96 | + | + | + |
| **6** | 12 | 90 | 70 | 0.96 | - | + | + |
| **7** | 12 | 100 | 50 | 1.00 | - | - | + |
| **8** | 8 | 90 | 50 | 1.00 | - | - | - |

**Table S4** Significance of the effects measured (gg-1) in the ruggedness test for Li in set A. Critical value is 5.38 (=0.05).

| **factor** | **level** | **ave. effect** | **s ave.** | **tcal** |
| --- | --- | --- | --- | --- |
| freq | 12 |  |  |  |
| freq | 8 | -2.3 | 2.0 | 1.1 |
| ener | 100 |  |  |  |
| ener | 90 | -0.6 | 2.0 | 0.3 |
| diam | 70 |  |  |  |
| diam | 50 | 0.2 | 2.0 | 0.1 |
| flow | 1.00 |  |  |  |
| flow | 0.96 | 0.1 | 2.0 | 0.05 |
| a | + |  |  |  |
| a | - | 0.4 | 2.0 | 0.2 |
| b | + |  |  |  |
| b | - | 0.1 | 2.0 | 0.04 |
| c | + |  |  |  |
| c | - | 0.9 | 2.0 | 0.4 |

**Table S5 Concentrations of Ti in gg-1 in one of the experiments using a single glass pane.**

|  | H1 | H2 | H3 | H4 | H5 | H6 | H7 | H8 | H9 | H10 |
| --- | --- | --- | --- | --- | --- | --- | --- | --- | --- | --- |
| Ti | 315.1 | 310.3 | 279.5 | 302.6 | 323.4 | 302.1 | 289.7 | 297.3 | 291.5 | 279.2 |
|  | 307.4 | 279.3 | 264.7 | 329.7 | 306.0 | 318.5 | 282.0 | 296.8 | 303.7 | 252.5 |
|  | 302.3 | 301.4 | 277.5 | 305.9 | 321.2 | 312.1 | 291.2 | 308.3 | 298.9 | 245.1 |
|  | 293.4 | 291.4 | 268.8 | 319.0 | 315.4 | 326.8 | 282.0 | 307.0 | 288.2 | 265.3 |
|  | 292.5 | 285.4 | 263.7 | 283.4 | 303.1 | 296.6 | 306.8 | 272.8 | 274.3 | 255.3 |
| average, gg-1 | 302.1 | 293.6 | 270.9 | 308.1 | 313.8 | 311.2 | 290.3 | 296.4 | 291.3 | 259.4 |
| s , gg-1 | 9.6 | 12.4 | 7.3 | 17.6 | 9.0 | 12.2 | 10.1 | 14.2 | 11.3 | 13.2 |
| rsd, % | 3.2 | 4.2 | 2.7 | 5.7 | 2.9 | 3.9 | 3.5 | 4.8 | 3.9 | 5.1 |
